# Supplementary material for: Establishment of head and neck squamous cell carcinoma mouse models for cetuximab resistance and sensitivity
Source: PubMed Central journal article supplement (PMC10792481; doi:10.20517/cdr.2023.62), 2023-10-17
Supplement: cdr-6-4-709-SupplementaryMaterials.pdf [file cdr-6-4-709-SupplementaryMaterials.pdf]

1 **Supplementary Materials**

2

3 **Establishment of head and neck squamous cell carcinoma mouse models for**  
4 **cetuximab resistance and sensitivity**

5

6

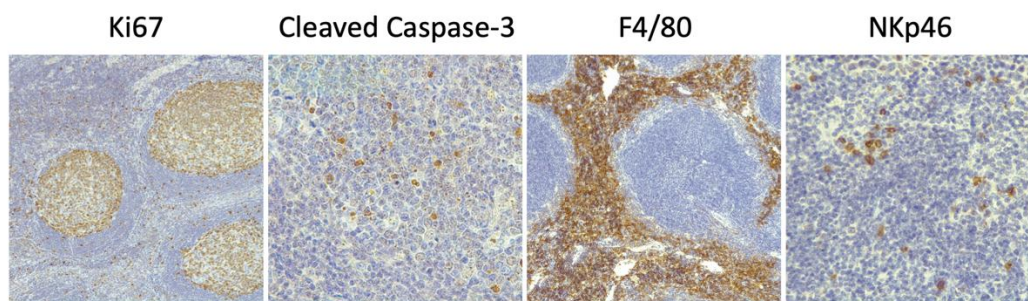

7

8 **Supplementary Figure 1.** Positive controls for immunohistochemistry. Positive  
9 controls for each marker consisted of mouse tissue of spleen for immunostaining with  
10 anti-Ki67 (shown at 100x), anti-F4/80 (shown at 100x) and anti-NKp46 antibodies  
11 (shown at 400x) and lymph node for detection of cleaved caspase-3 (shown at 400x).

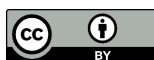

© The Author(s) 2023. Open Access This article is licensed under a Creative Commons Attribution 4.0 International License (<https://creativecommons.org/licenses/by/4.0/>), which permits unrestricted use, sharing, adaptation, distribution and reproduction in any medium or

format, for any purpose, even commercially, as long as you give appropriate credit to the original author(s) and the source, provide a link to the Creative Commons license, and indicate if changes were made.

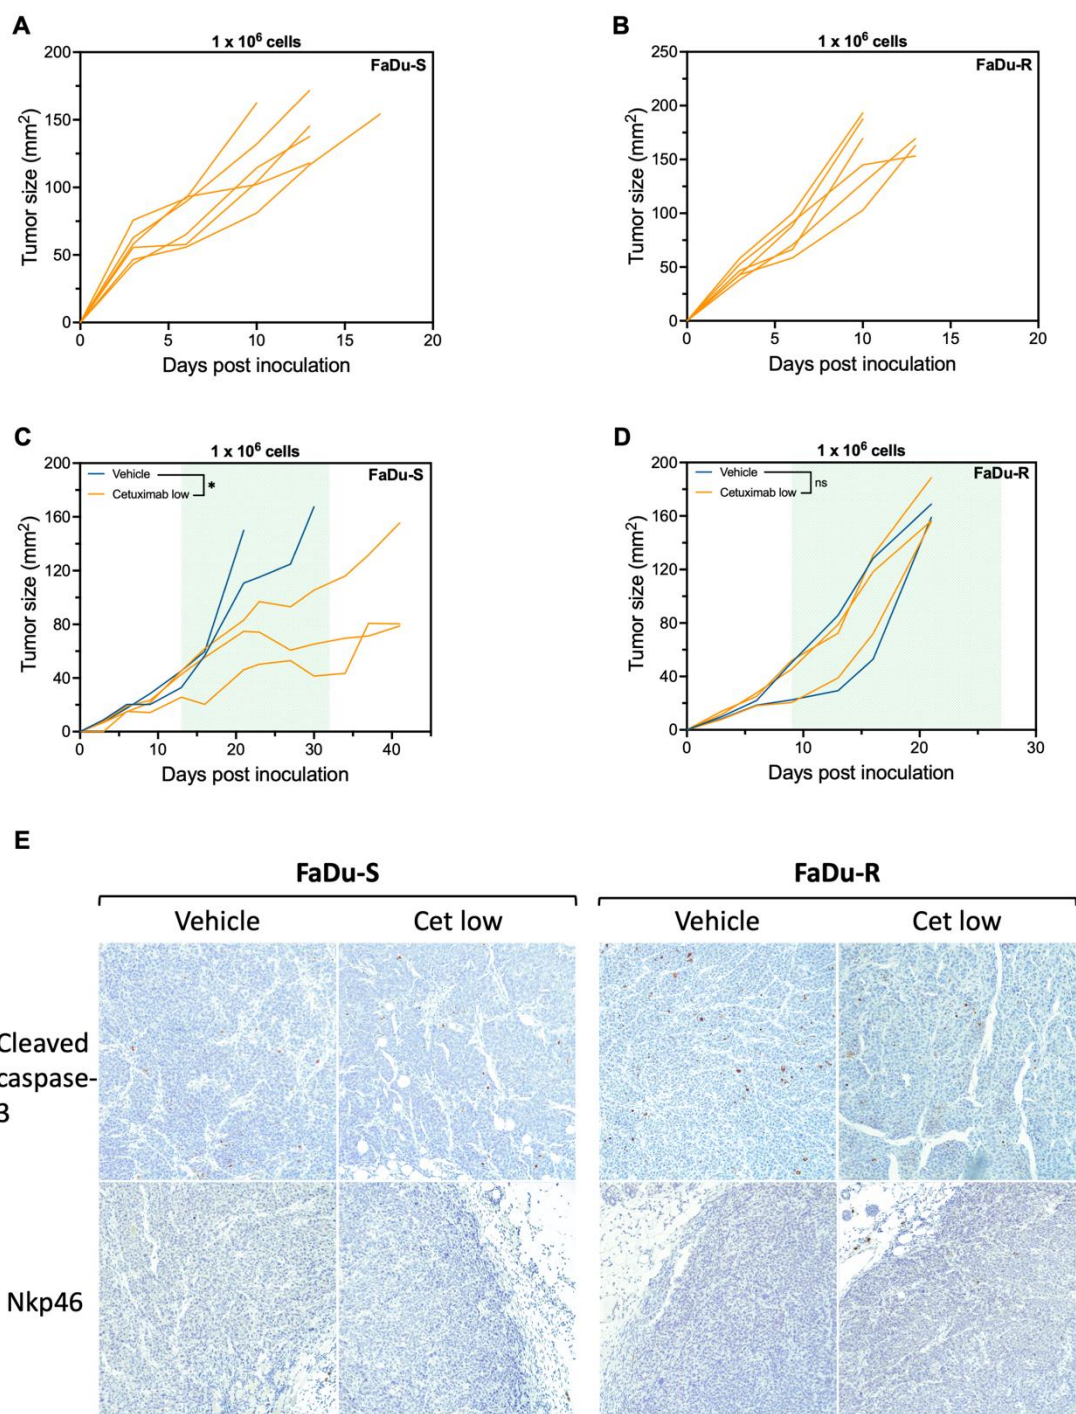

12

13 **Supplementary Figure 2.** Cetuximab had no effect on apoptosis or NK infiltration in  
 14 FaDu HNSCC cell lines that retained their resistance status *in vivo*. (A-B) Tumor  
 15 kinetics of CB17 Scid mice inoculated with  $1 \times 10^6$  cetuximab-sensitive FaDu-S cells  
 16 (A,  $n = 6$ ) or cetuximab-resistant FaDu-R cells (B,  $n = 6$ ); (C-D) Tumor kinetics of  
 17 CB17 Scid mice after s.c. injection with  $1 \times 10^6$  cetuximab-sensitive FaDu-S cells (C)  
 18 or cetuximab-resistant FaDu-R cells (D) following treatment with vehicle (PBS,  $n = 2$ )  
 19 or cetuximab low (2.5 mg/kg,  $n = 3$ ). Treatment was initiated when tumors reached an

20 average size of 30 mm<sup>2</sup>, which is represented by the green area in each graph. Each line  
21 represents the data of one individual mouse. *P*-values were determined using a linear  
22 mixed model; (E) Representative images of immunohistochemical staining with  
23 anti-cleaved caspase-3 anti-cleaved caspase-3 (apoptosis), and anti-NKp46 (NK cells)  
24 antibodies, shown at 100x. Vehicle: PBS; cet low: 2.5 mg/kg cetuximab; cet mid: 10  
25 mg/kg cetuximab; \**P* < 0.05; ns: non-significant; -S: cetuximab sensitive cell line; -R:  
26 cetuximab resistant cell line.
